# Supplementary material for: Use of Chou’s 5-steps rule to predict the subcellular localization of gram-negative and gram-positive bacterial proteins by multi-label learning based on gene ontology annotation and profile alignment
Source: PubMed Central journal article supplement (PMC8035964; doi:10.1515/jib-2019-0091), 2020-06-29
Supplement: jib-18-20190091-s002.pdf [file jib-18-20190091-s002.pdf]

# Use of Chou's 5-Steps Rule to Predict the Subcellular Localization of Gram-Negative and Gram-Positive Bacterial Proteins by Multi-Label Learning based on Gene Ontology Annotation and Profile Alignment

Hafida Bouziane and Abdallah Chouarfia

Département d'Informatique

Université des Sciences et de la Technologie d'Oran Mohamed Boudiaf, USTO-MB

BP 1505, El M'Naouer, 31000 Oran Algérie

e-mail: (hafida.bouziane,chouarfia)@univ-usto.dz

The results reported in Tab.1, Tab.2 and Tab.3 show how the predicted locations have been obtained by the consensus model for the remaining multi-sites proteins in Gram-negative bacterial proteins dataset, where 18 proteins are localized in cytoplasm and inner membrane regions (I/C) and 6 proteins in cytoplasm and periplasm regions (C/P). The predictions provided by our consensus model have been compared against three state-of-art SCL prediction methods, namely CELLO2GO<sup>1</sup> [1], BUSCA<sup>2</sup> [2] and UniLoc<sup>3</sup> [3]. CELLO2GO is based on GO terms and uses BLAST to search for homologous sequences. The recent method BUSCA combines three SCL prediction methods (BaCelLo [4], MemLoc [5] and SChloro [6]) and methods for identifying signal and transit peptides, glycosylphosphatidylinositol (GPI)-anchors and transmembrane domains. Whereas UniLoc SCL prediction is based on the implicit similarity between proteins, it identifies template proteins based on the number of shared related words using PSI-BLAST search against NCBI nr<sup>4</sup> database.

## References

- [1] C. Yu, C. Cheng, W. Su, K. Chang, S. Huang, J. Hwang, and C. Lu, "CELLO2GO: A Web Server for Protein subCELLular LOcalization Prediction with Functional Gene Ontology Annotation," *PLoS ONE*, vol. 9, no. 6, p. e99368, 2014. 1
- [2] C. Savojardo, P. Martelli, P. Fariselli, G. Profiti, and R. Casadio, "BUSCA: an integrative web server to predict subcellular localization of proteins," *Nucleic Acids Research*, vol. 46, no. W1, pp. W459–W466, 2018. 1
- [3] H. Lin, C. Chen, T. Sung, and W. Hsu, "UniLoc: A universal protein localization site predictor for eukaryotes and prokaryotes," *bioRxiv*, 2018. 1

---

<sup>1</sup><http://cello.life.nctu.edu.tw/cello2go/>

<sup>2</sup><http://busca.biocomp.unibo.it/>

<sup>3</sup><http://bioapp.iis.sinica.edu.tw/UniLoc/>

<sup>4</sup><ftp://ftp.ncbi.nlm.nih.gov/blast/db/>

| Protein name      | Predicted essential GO terms                         |                          |                                        | Top ranked CC description                             | Predicted location (s) |               |          |           |          |       |        |
|-------------------|------------------------------------------------------|--------------------------|----------------------------------------|-------------------------------------------------------|------------------------|---------------|----------|-----------|----------|-------|--------|
|                   | MF                                                   | BP                       | CC                                     |                                                       | PseAAC                 | PSSM profiles | GO terms | Consensus | CELLO2GO | BUSCA | UniLoc |
| RNI_AERHY<br>C/P  | GO:0033897<br>GO:0003723<br>GO:0008847               | GO:0090502               | GO:0042597<br>GO:0005737               | periplasmic space<br>cytoplasm                        | C                      | I             | P        | I/P       | P        | C     | C/S    |
| SECM_ECOLI<br>C/P | GO:0045182                                           | GO:0006417               | GO:0005829<br>GO:0042597               | cytosol<br>periplasmic space                          | I                      | I             | P        | I/P       | C/P      | C     | C/P    |
| FKBB_ECOLI<br>C/P | GO:0003755<br>GO:0005528<br>GO:0042802               | GO:0000413<br>GO:0006457 | GO:0042597<br>GO:0005829               | periplasmic space<br>cytosol                          | C                      | O             | P        | P/O       | C        | C     | C/P    |
| PLCR_PSEAE<br>C/P |                                                      |                          | GO:0042597<br>GO:0005737               | periplasmic space<br>cytoplasm                        | C                      | I             | P        | I/P       | S/P      | C     | P      |
| PA1L_PSEAE<br>C/P | GO:0030246                                           | GO:0007157               | GO:0009986<br>GO:0042597<br>GO:0005737 | cell surface<br>periplasmic space<br>cytoplasm        | S                      | I             | P        | I/P       | C/P      | C     | C/P    |
| RNI_ECOLI<br>C/P  | GO:0033897<br>GO:0008847<br>GO:0003723<br>GO:0016829 | GO:0090502<br>GO:0006401 | GO:0030288<br>GO:0005737               | outer membrane-bounded periplasmic space<br>cytoplasm | P                      | P             | P        | P         | P        | S     | C/P    |

**Tab. 1:** The proposed SCL prediction model predictions for some multiple sites proteins localized in cytoplasmic and periplasmic spaces of Gram-negative bacterial dataset versus CELLO2GO, BUSCA and UniLoc predictions.

| Protein name       | Predicted essential GO terms                                                                   |                                                                                               |                                        | Top ranked CC description                                               | Predicted location (s) |               |          |           |          |       |        |
|--------------------|------------------------------------------------------------------------------------------------|-----------------------------------------------------------------------------------------------|----------------------------------------|-------------------------------------------------------------------------|------------------------|---------------|----------|-----------|----------|-------|--------|
|                    | MF                                                                                             | BP                                                                                            | CC                                     |                                                                         | PseAAC                 | PSSM profiles | GO terms | Consensus | CELLO2GO | BUSCA | UniLoc |
| IUCD_ECOLI /I      | GO:0047091<br>GO:0008233                                                                       | GO:005114<br>GO:0046442<br>GO:0072351<br>GO:0055072<br>GO:0042398<br>GO:0051188<br>GO:0006508 | GO:0005886<br>GO:0005737               | plasma membrane<br>cytoplasm                                            | C                      | C             | I        | C/I       | C/I      | C/M   | C/M    |
| KAIB_SYN7<br>C/I   | GO:0005515                                                                                     | GO:0007623<br>GO:0042326<br>GO:0009649                                                        | GO:0005886<br>GO:0005737               | plasma membrane<br>cytoplasm                                            | C                      | C             | C        | C         | C        | C     | C/M    |
| PNP_ECOLI<br>C/I   | GO:0004654<br>GO:0000287<br>GO:0003723<br>GO:0000175<br>GO:0035438<br>GO:0042802<br>GO:0016301 | GO:0006402<br>GO:0006396<br>GO:0009408<br>GO:0090503<br>GO:0016310                            | GO:0005737<br>GO:0016020               | cytoplasm<br>membrane                                                   | C                      | C             | C        | C         | C        | C     | C      |
| PTNAB_ECOLI<br>C/I | GO:0008982<br>GO:0103111<br>GO:0015578<br>GO:0016301<br>GO:0005515                             | GO:0034219<br>GO:0009401<br>GO:0016310                                                        | GO:0005737<br>GO:0016021<br>GO:0005886 | cytoplasm<br>integral component of membrane<br>plasma membrane          | C                      | C             | I        | C/I       | C        | C     | C      |
| YSCB_YERPE<br>C/I  | GO:0005515                                                                                     | GO:0050708                                                                                    | GO:0005737<br>GO:0005886               | cytoplasm<br>plasma membrane                                            | I                      | I             | I        | I         | C        | C     | C/M    |
| DMSD_ECOLI<br>C/I  | GO:0005048<br>GO:0005515                                                                       | GO:0061077                                                                                    | GO:0031234<br>GO:0005737               | extrinsic component of cytoplasmic side of plasma membrane<br>cytoplasm | C                      | C             | C        | C         | I        | C     | C/M    |
| DLDH_ECOLI<br>C/I  | GO:0004148<br>GO:0050660<br>GO:0009055<br>GO:0042802<br>GO:0015036<br>GO:0008270               | GO:0045454<br>GO:0022900<br>GO:0006096<br>GO:0006103<br>GO:0019464<br>GO:0006979              | GO:0005623<br>GO:0016020               | cell<br>membrane                                                        | C                      | C             | C        | C         | C        | C     | C      |
| YHBG_ECOLI<br>C/I  | GO:0016887<br>GO:0005524<br>GO:0015437<br>GO:0044877                                           | GO:0055085<br>GO:0015920                                                                      | GO:0043190<br>GO:0005737               | ATP-binding cassette (ABC) transporter complex<br>cytoplasm             | C                      | I             | I        | I         | C/I      | C     | C/M    |
| PSS_ECOLI<br>C/I   | GO:0017169<br>GO:0016787                                                                       | GO:0032049                                                                                    | GO:0005829<br>GO:0005886               | cytosol<br>plasma membrane                                              | C                      | C             | I        | C/I       | C/I      | C     | C/M    |

**Tab. 2:** The proposed SCL prediction model predictions for some multiple sites proteins localized in cytoplasmic and inner membrane regions of Gram-negative bacterial dataset versus CELLO2GO, BUSCA and UniLoc predictions.

- [4] A. Pierleoni, P. Martelli, P. Fariselli, and R. Casadio, "BaCelLo: a balanced subcellular localization predictor," *Bioinformatics*, vol. 22, no. 14, pp. e408–e416, 2006. 1
- [5] A. Pierleoni, P. Martelli, and R. Casadio, "MemLoc: predicting subcellular localization of membrane proteins in eukaryotes," *Bioinform-*

| Protein name       | Predicted essential GO terms                                                                                 |                                                                                                |                                                                    | Top ranked CC description                                                                                         | Predicted location (s) |               |          |           |          |       |        |
|--------------------|--------------------------------------------------------------------------------------------------------------|------------------------------------------------------------------------------------------------|--------------------------------------------------------------------|-------------------------------------------------------------------------------------------------------------------|------------------------|---------------|----------|-----------|----------|-------|--------|
|                    | MF                                                                                                           | BP                                                                                             | CC                                                                 |                                                                                                                   | PseAAC                 | PSSM profiles | GO terms | Consensus | CELLO2GO | BUSCA | UniLoc |
| GSPA_AERHY<br>C/I  | GO:0005524<br>GO:0008233<br>GO:0017111                                                                       | GO:0051301<br>GO:0006508                                                                       | GO:0016021<br>GO:0005886<br>GO:0005737                             | integral component of membrane<br>plasma membrane<br>cytoplasm                                                    | C                      | C             | I        | C/I       | C/I      | C     | C/M    |
| DNAK_ECOLI<br>C/I  | GO:0051082<br>GO:0005524<br>GO:0051087<br>GO:0044183<br>GO:0016989<br>GO:0019904<br>GO:0043531<br>GO:0008270 | GO:0006457<br>GO:0034620<br>GO:0009408<br>GO:0032984<br>GO:1903507<br>GO:0065003<br>GO:0006260 | GO:0005829<br>GO:0005886<br>GO:0032991                             | cytosol<br>plasma membrane<br>protein-containing complex                                                          | C                      | C             | I        | C/I       | C        | C     | C/M    |
| HTPG_ECOLI<br>C/I  | GO:0051082<br>GO:0005524<br>GO:0016301<br>GO:0042802<br>GO:0042623                                           | GO:0006457<br>GO:0016310<br>GO:0009408<br>GO:0006974                                           | GO:0005737<br>GO:0005886                                           | cytoplasm<br>plasma membrane                                                                                      | C                      | C             | C        | C         | C        | C     | C      |
| NUOG_ECOLI<br>C/I  | GO:0043546<br>GO:0048038<br>GO:0051537<br>GO:0008137<br>GO:0051539<br>GO:0009055<br>GO:0046872<br>GO:0005515 | GO:0042773<br>GO:0009060                                                                       | GO:0016020<br>GO:1990204<br>GO:0071944<br>GO:0005737               | membrane<br>oxidoreductase complex<br>cell periphery<br>cytoplasm                                                 | C                      | C             | I        | C/I       | C/I      | C     | M      |
| NUOCD_ECOLI<br>C/I | GO:0048038<br>GO:0050136<br>GO:0051287<br>GO:0005515                                                         | GO:0055114                                                                                     | GO:0030964<br>GO:0005886<br>GO:0005737<br>GO:0098803<br>GO:1990204 | NADH dehydrogenase complex<br>plasma membrane<br>cytoplasm<br>respiratory chain complex<br>oxidoreductase complex | C                      | C             | I        | C/I       | C        | C     | C/M    |
| FHUF_ECOLI<br>C/I  | GO:0051537<br>GO:0016491<br>GO:0046872                                                                       | GO:0055114<br>GO:0033212                                                                       | GO:0005829<br>GO:0005886<br>GO:0016021                             | cytosol<br>plasma membrane<br>integral component of membrane                                                      | C                      | C             | I        | C/I       | C/I      | C     | C/M    |
| TRME_ECOLI<br>C/I  | GO:0003924<br>GO:0005525<br>GO:0046872<br>GO:0019003<br>GO:0042802                                           | GO:0006400<br>GO:0009268<br>GO:0061077<br>GO:0001510                                           | GO:0005737<br>GO:0005886                                           | cytoplasm<br>plasma membrane                                                                                      | C                      | C             | C        | C         | C        | C     | C      |
| SYCN_YERPE<br>C/I  |                                                                                                              | GO:0009306                                                                                     | GO:0005886<br>GO:0005737                                           | plasma membrane<br>cytoplasm                                                                                      | I                      | C             | I        | C/I       | C/I      | C     | C/M    |

**Tab. 3:** The proposed SCL prediction model predictions for some multiple sites proteins localized in cytoplasmic and inner membrane regions of Gram-negative bacterial dataset versus CELLO2GO, BUSCA and UniLoc predictions.

*matics*, vol. 27, no. 9, pp. 1224–1230, 2011. 1

- [6] C. Savojardo, P. Martelli, P. Fariselli, and R. Casadio, “SCHloro: directing viridiplantae proteins to six chloroplastic sub-compartments,” *Bioinformatics*, vol. 33, no. 3, pp. 347–353, 2016. 1
